# Supplementary material for: Growth and Cell Size of Microalga Auxenochlorella protothecoides AS-1 under Different Trophic Modes
Source: MDPI journal article supplement (doi:10.3390/microorganisms12040835), 2024-04-20
Supplement: s1 [file s1]

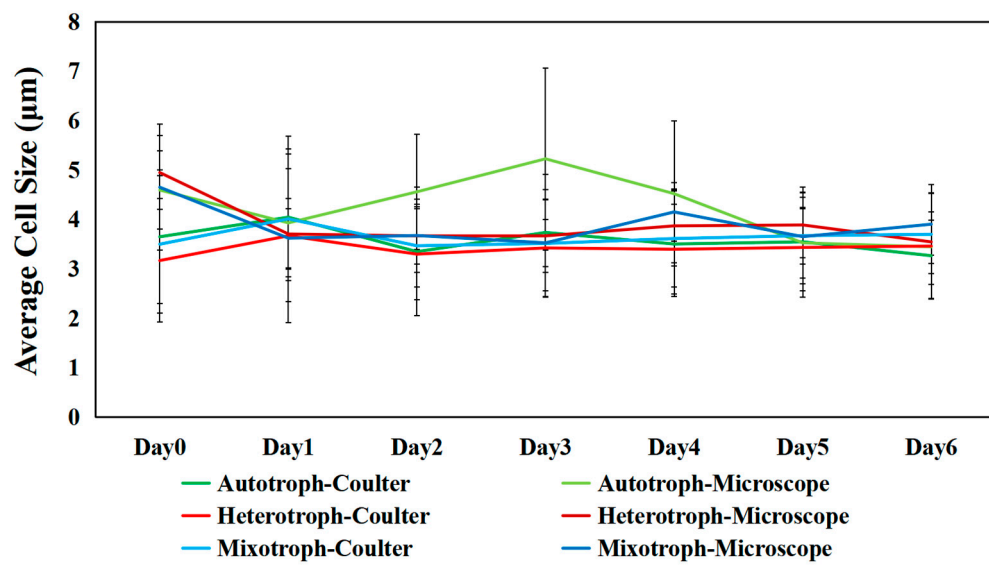

**Figure S1.** A comparison of the average cell diameter obtained from the Coulter counter Multisizer 4e with data from the light microscope (Based on 20 cells).

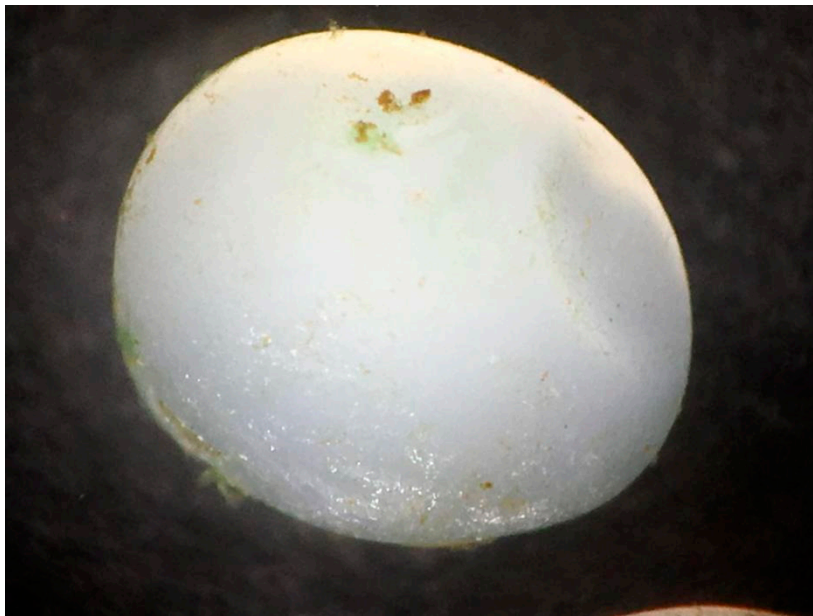

**Figure S2.** The biofilm on microplastics under a light microscope. Greenish-colored biofilm was observed on the surface of microplastics.
